# Supplementary material for: Primary care management of patients after weight loss surgery
Source: HighWire-hosted journal article supplement (doi:10.1136/bmj.i945), 2016-03-10
Supplement: moom024533.ww1_default.pdf [file moom024533.ww1_default.pdf]

# Assessing and referring complications following **bariatric surgery**

## Key

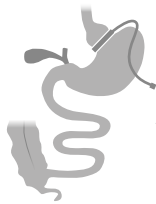

**GB**  
Adjustable  
gastric  
banding

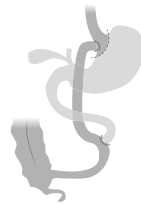

**RYB**  
Roux-en-Y  
gastric  
bypass

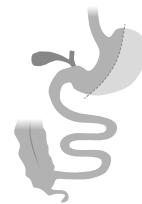

**SG**  
Sleeve  
gastrectomy

## Action speed

Emergency (within 24 hours)

Urgent (1–2 weeks)

Routine

## Symptoms

## Possible cause

## Referral

## Action

### Severe symptoms

First 30 days

Abdominal pain **Increasing / Severe**  
Unexplained tachycardia  
Pyrexia  
Chest pain / Breathlessness  
Continuous vomiting

Bleed from surgical site  
Leak from a staple line / join  
Bowel perforation  
Deep vein thrombosis / pulmonary embolism

Bariatric centre

Possible re-operation  
Standard deep vein thrombosis protocols

### Persistent vomiting/dysphagia

First year

**GB**  
**RYB**  
**SG**

Intestinal obstruction  
Thiamine deficiency  
Overfilled band  
Band slippage  
Anastomotic stricture  
Internal hernia  
Volvulus of the sleeve  
Sleeve stricture

Bariatric centre

Low threshold for perenteral thiamine administration and intravenous pabrinex

Bariatric centre

Band deflation  
Endoscopic / surgical intervention

Bariatric centre

Endoscopy

Opinion from bariatric centre

May require surgery

At any time

Haematemesis  
Anaemia  
Melaena

Gastrointestinal bleeding

General surgeon +

Opinion from bariatric centre

Unclear diagnosis

Consider general surgery problems unrelated to bariatric procedure

General surgeon

Standard emergency management

Intermittent abdominal pain

Unexplained vomiting/heartburn

**GB** Hot/red/swollen skin around port site

Insidious presentation of the above complications

Skin flora contamination

Delayed port site infection due to band erosion into stomach

Bariatric centre

Further investigation required. Often how band slippage presents

Bariatric centre

Consider re-siting port or removing gastric band completely

Gallstone formation

+ Cholecystitis / Pancreatitis  
+ Symptoms of biliary colic

Radiology

Routine ultrasonography

Anaemia

Bariatric patients are prone to dietary deficiencies

None

Measure ferritin, vitamin B12 and folate, cascading to zinc and copper

**RYB** / **SG (rare)**

Abdominal discomfort / Nausea  
Diarrhoea / Flushing / Syncope

Dumping symptoms

None

Symptoms should improve with time. Advise:  
• Small, frequent meals  
• Avoid drinks with meals  
• Increase fibre and protein

**RYB**

Loss of consciousness / Sweating  
Low blood sugar readings

Insulin mediated hypoglycaemia

Endocrine specialist
